# Supplementary material for: Raman microimaging of murine lungs: insight into the vitamin A content
Source: Royal Society of Chemistry journal article supplement (doi:10.1039/c4an01881h), 2014-12-11
Supplement: c4an01881h1.pdf [file c4an01881h1.pdf]

## Supplementary Materials

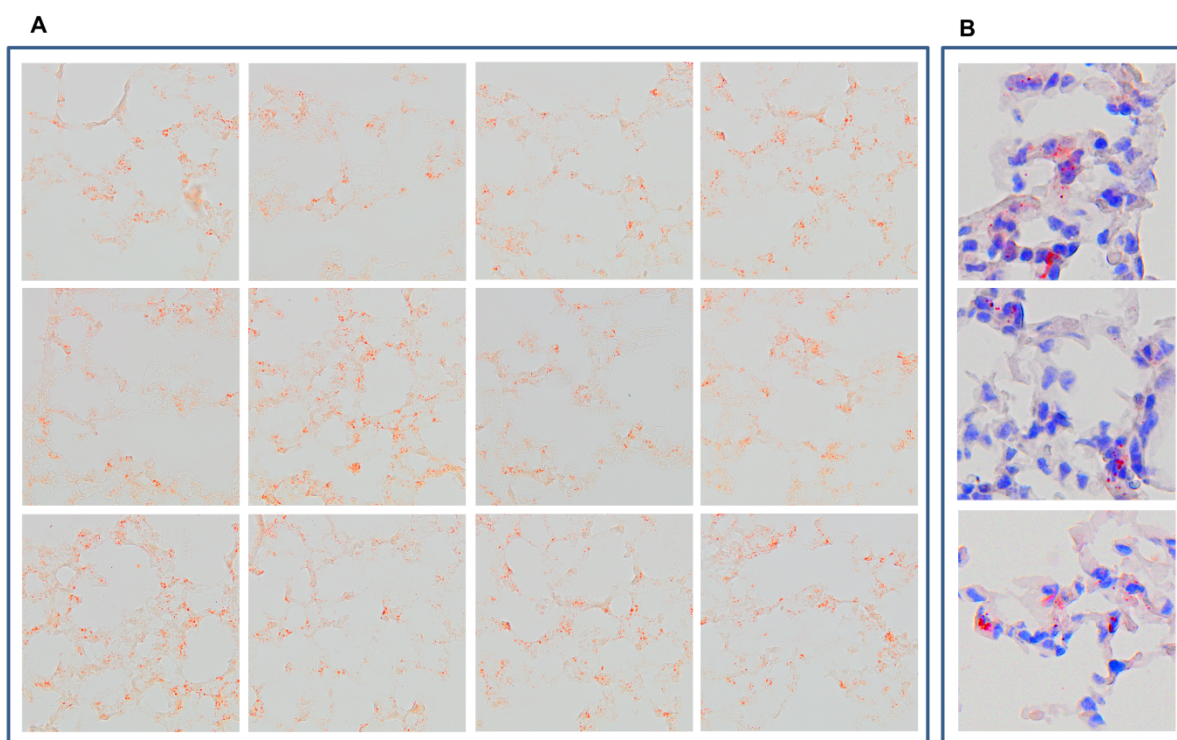

**Figure S1.** A microphotograph (x40) of a part of cross section of middle part of lungs of control C57 mice stained with (A) the Oil Red O (ORO), and (B) the ORO and the hematoxylin and eosin (H&E) method.
